# Supplementary material for: Perspectiva del negocio financiero luego de la crisis
Source: Royal Society of Chemistry journal article supplement (doi:10.1039/d0bm00533a), 2010-01-01
Supplement: d0bm00533a1.pdf [file d0bm00533a1.pdf]

## Supporting Information

# Hollow Ferric-Tannic Acid Nanocapsules with Sustained O<sub>2</sub> and ROS Induction for Synergistic Tumor Therapy

---

<sup>a</sup> State Key Laboratory of Silicon Materials, School of Materials Science and Engineering, Zhejiang University, Hangzhou 310027, P.R. China

<sup>b</sup> Department of Surgery, Second Affiliated Hospital, Zhejiang University School of Medicine, Zhejiang University, Hangzhou, 310000, P. R. China

† Authors with equal contribution

\*Corresponding authors: [xiang.li@zju.edu.cn](mailto:xiang.li@zju.edu.cn) (XL)

Huimin Zhu, <sup>† a</sup> Guodong Cao, <sup>† b</sup> Chu Qiang, <sup>a</sup> YiKe Fu, <sup>a</sup> Yulian Wu, <sup>b</sup> Xiang Li <sup>\*a</sup> and Gaorong Han <sup>a</sup>

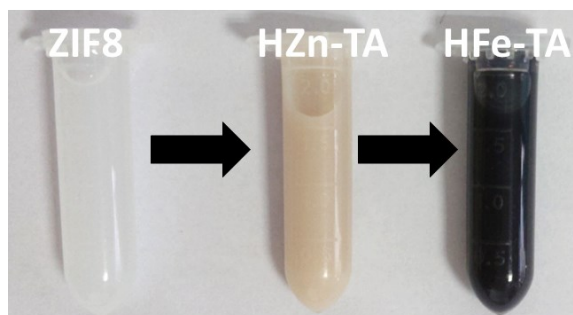

**Figure S1.** The color of ZIF8, HZn-TA and HFe-TA solutions during synthetic process.

**Table S1.** The surface area, pore volume and pore size of HFe-TA nanoparticles.

| Surface area<br>[m <sup>2</sup> g <sup>-1</sup> ] | Pore volume<br>[cm <sup>3</sup> g <sup>-1</sup> ] | Pore size<br>[nm] |
|---------------------------------------------------|---------------------------------------------------|-------------------|
| ~45.1                                             | ~0.2                                              | ~19.2             |

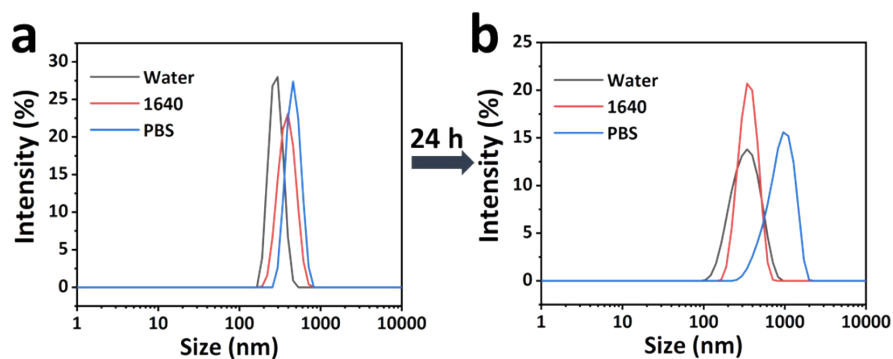

**Figure S2.** Size distribution of HFe-TA nanocapsules in water, 1640 (containing 10% fetal bovine serum), and PBS for (a) 0 h and (b) 24 h.

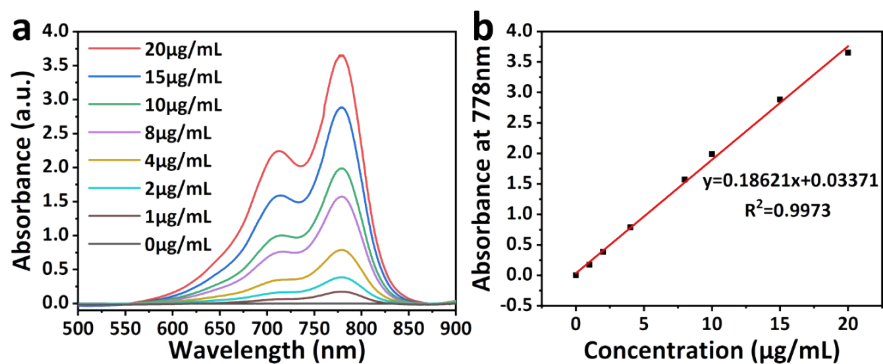

**Figure S3.** (a) UV-vis absorbance spectra of ICG in water with different concentrations, and (b) the ICG standard curve of absorbance at 778 nm.

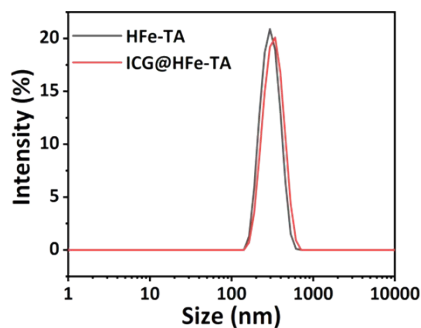

**Figure S4.** (a) Size distribution of HFe-TA and ICG@HFe-TA.

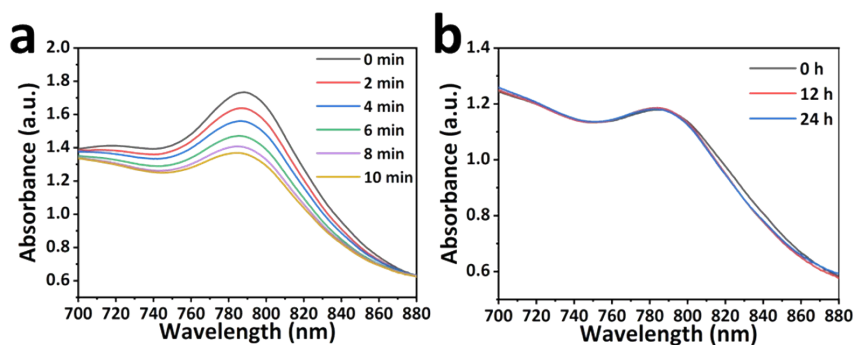

**Figure S5.** Absorbance of ICG (a) with different irradiation time and (b) without irradiation for ICG@HFe-TA.

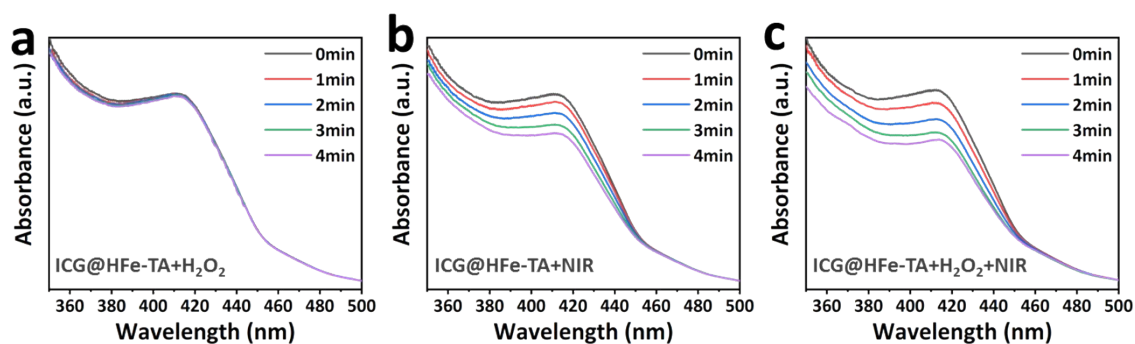

**Figure S6.** Time-dependent depletion of DPBF due to  $^1\text{O}_2$  generation: (a)  $200 \mu\text{g mL}^{-1}$  of ICG@HFe-TA with  $250 \mu\text{M H}_2\text{O}_2$ , (B)  $200 \mu\text{g mL}^{-1}$  of ICG@HFe-TA with 808 nm laser ( $1.5 \text{ W cm}^{-2}$ ). (c)  $200 \mu\text{g mL}^{-1}$  of ICG@HFe-TA with  $250 \mu\text{M H}_2\text{O}_2$  and 808 nm laser ( $1.5 \text{ W cm}^{-2}$ ).

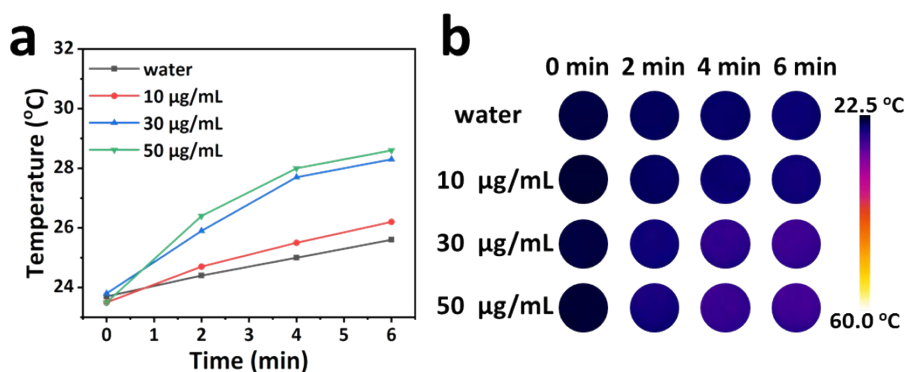

**Figure S7.** (a) Curves and (b) photographs of temperature variation of ICG@HFe-TA solutions with different concentrations under 808nm-NIR irradiation for varied period.

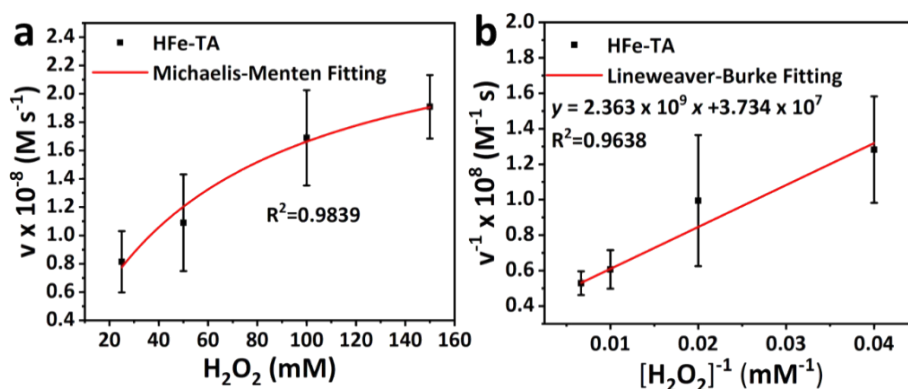

**Figure S8.** (a) The Michaelis-Menten fitting curves of initial hydroxyl radical generation velocities versus  $\text{H}_2\text{O}_2$  concentration. (b) The Lineweaver-Burke fitting (double reciprocal) of Michaelis-Menten fitting curve. (Mean values and error bars are defined as mean and s.d. , respectively. )

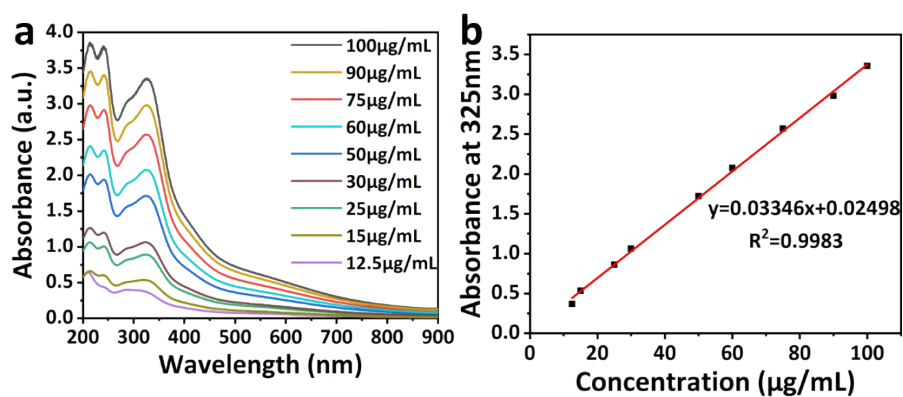

**Figure S9.** (a) UV-vis absorbance spectra of HFe-TA in water with different concentrations, and (b) the HFe-TA standard curve of absorbance at 325 nm.

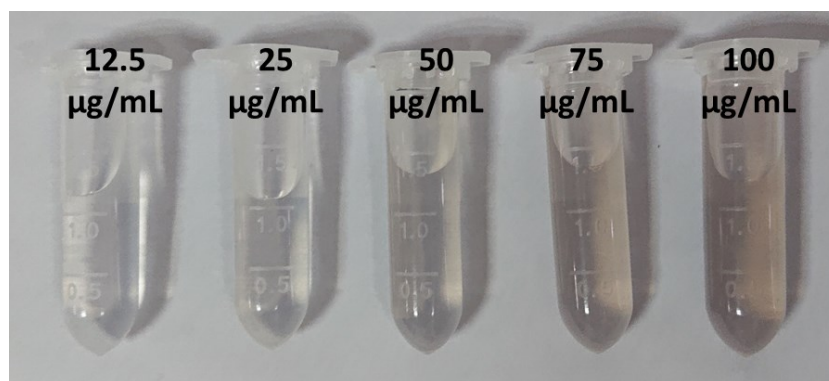

**Figure S10.** Digital photographs of different concentrations of HFe-TA solutions.

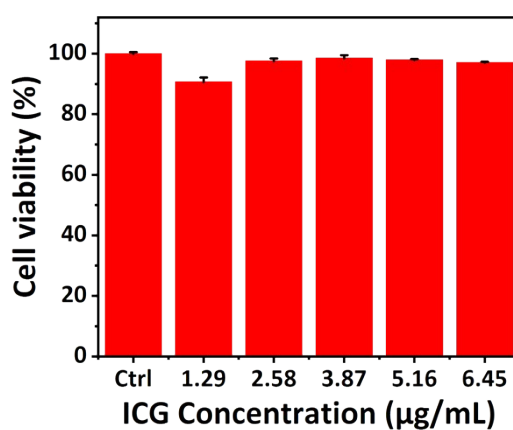

**Figure S11.** 4T1 cells viability incubated with different concentrations of ICG.

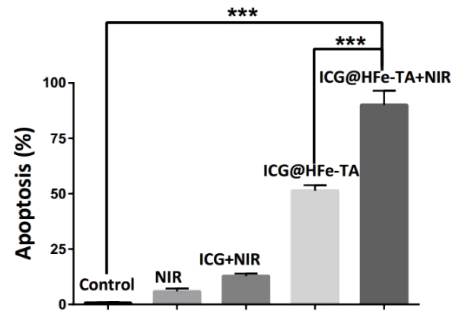

**Figure S12.** The bar graph presents the percentage of apoptotic cells. The experiments were performed in triplicate; the data are expressed as the mean  $\pm$  standard deviation.

\*\*\* P<0.001

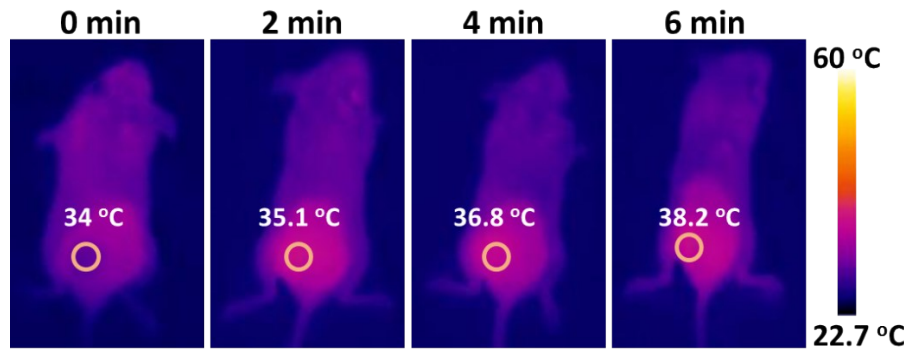

**Figure S13.** Infrared thermographic images of mice bearing tumor treated with ICG@HFe-TA after 4h intratumoral injection under 808nm-NIR irradiation.

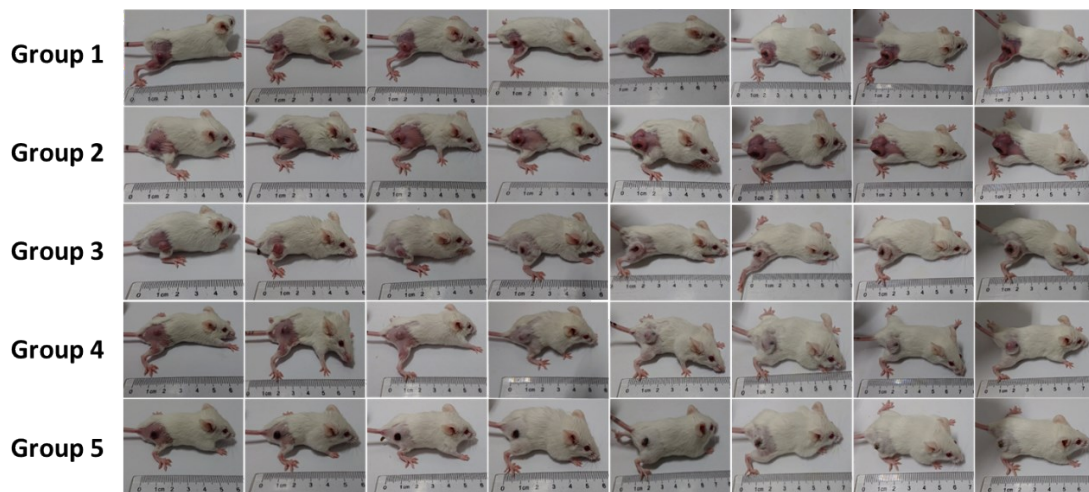

**Figure S14.** Images of 4T1 tumor-bearing Balb/c mice of each group on every 2-day in 14 days receiving various treatments.

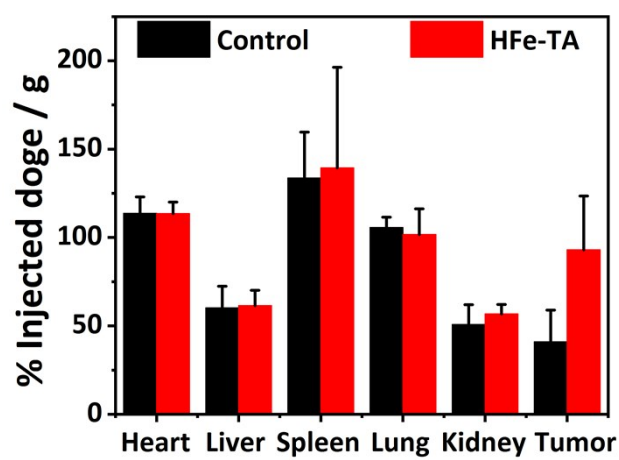

**Figure S15.** The biodistribution of Fe (% injected dose of Fe per gram of tissues) in main organs and tumor after injection for 24 h.
